# Supplementary material for: Exploring Structure–Activity Relationships of Niclosamide-Based Colistin Potentiators in Colistin-Resistant Gram-Negative Bacteria
Source: MDPI journal article supplement (doi:10.3390/antibiotics13010043), 2024-01-03
Supplement: s1 [file s1]

## Supplementary information

# Exploring Structure–Activity Relationships of Niclosamide-Based Colistin Potentiators in Colistin- Resistant Gram-Negative Bacteria

Liam Berry <sup>1</sup>, Quinn Neale <sup>1</sup>, Rajat Arora <sup>1</sup>, Danyel Ramirez <sup>1</sup>, Marc Brizuela <sup>1</sup>, Ronald Domalaon <sup>1</sup>,  
Gilbert Arthur <sup>2</sup> and Frank Schweizer <sup>1,3,\*</sup>

<sup>1</sup> Department of Chemistry, University of Manitoba, Winnipeg, MB R3T 2N2, Canada;  
berryl3@myumanitoba.ca (L.B.); nealeq@myumanitoba.ca (Q.N.);  
arorar5@myumanitoba.ca (R.A.); ramiredm@myumanitoba.ca (D.R.);  
marc.brizuela@umanitoba.ca (M.B.)

<sup>2</sup> Department of Biochemistry and Medical Genetics, University of Manitoba,  
Winnipeg, MB R3E 3N4, Canada; gilbert.arthur@umanitoba.ca

<sup>3</sup> Department of Medical Microbiology and Infectious Diseases, University of Manitoba,  
Winnipeg, MB R3E 0J9, Canada

\* Correspondence: frank.schweizer@umanitoba.ca

## Contents

|                                                      |     |
|------------------------------------------------------|-----|
| NMR spectra of compounds used for biological testing | S1  |
| Extended biological data                             | S21 |

## NMR Spectra of compounds used for biological testing

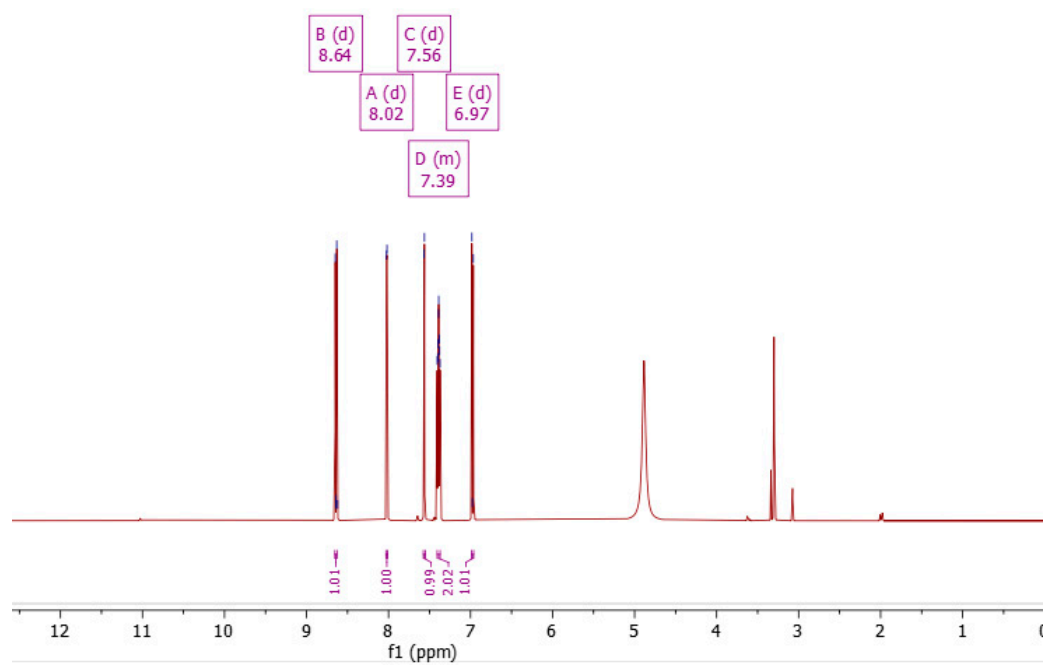

Figure S1 <sup>1</sup>H NMR spectrum of compound 1

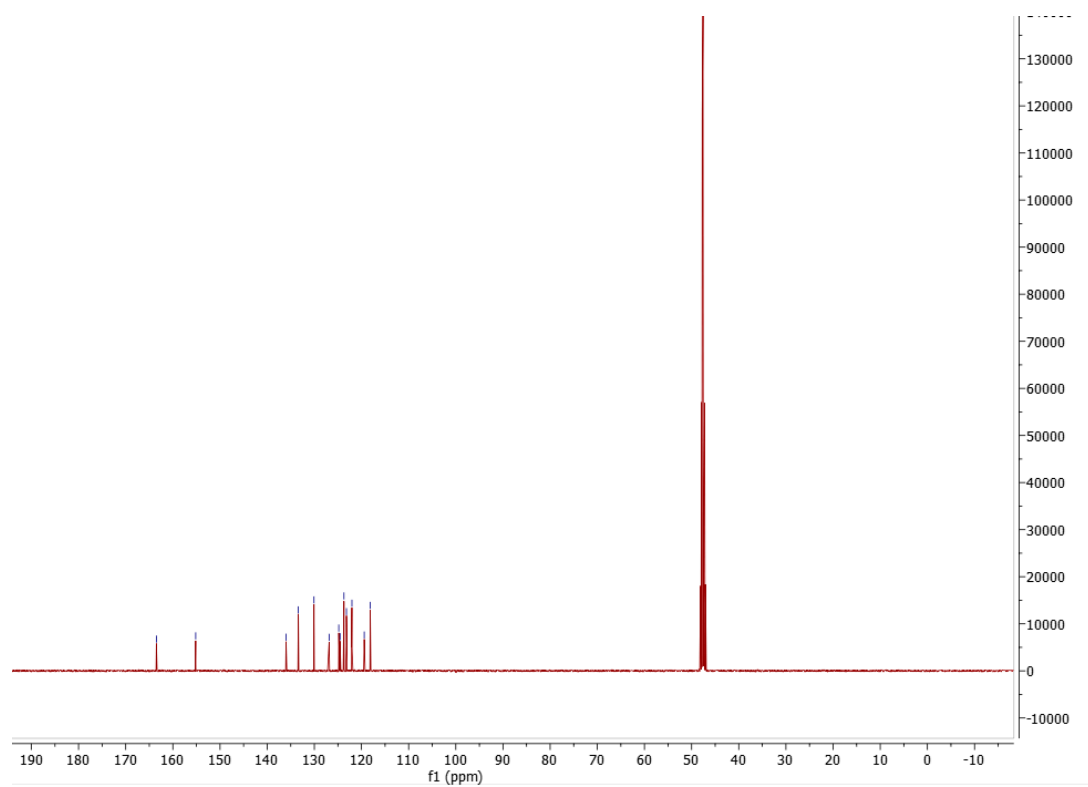

**Figure S2**  $^{13}\text{C}$  NMR spectrum of compound **1**

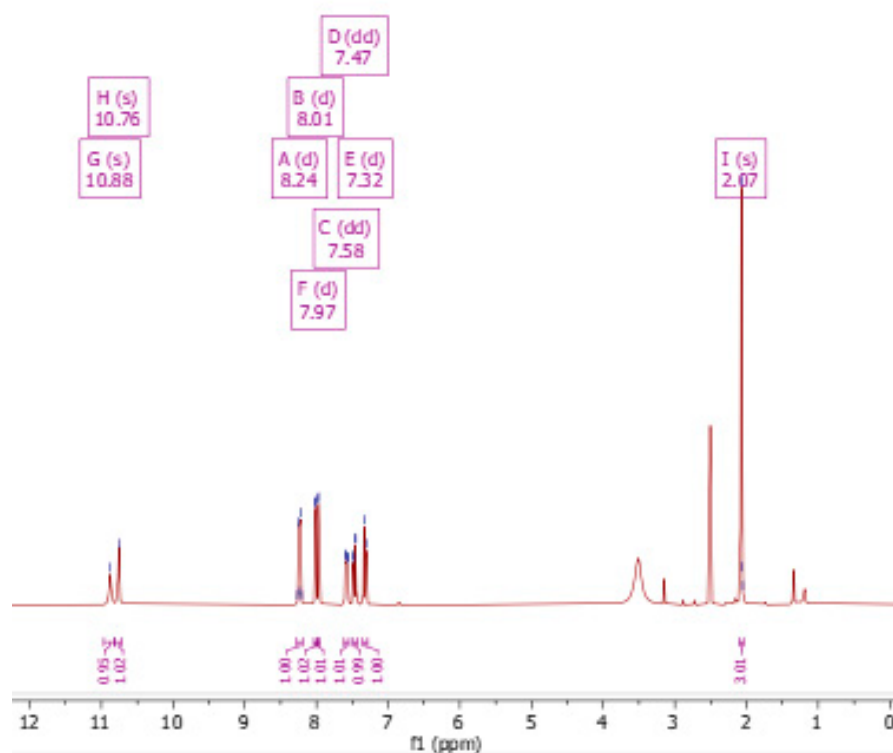

**Figure S3**  $^1\text{H}$  NMR spectrum of compound **2**

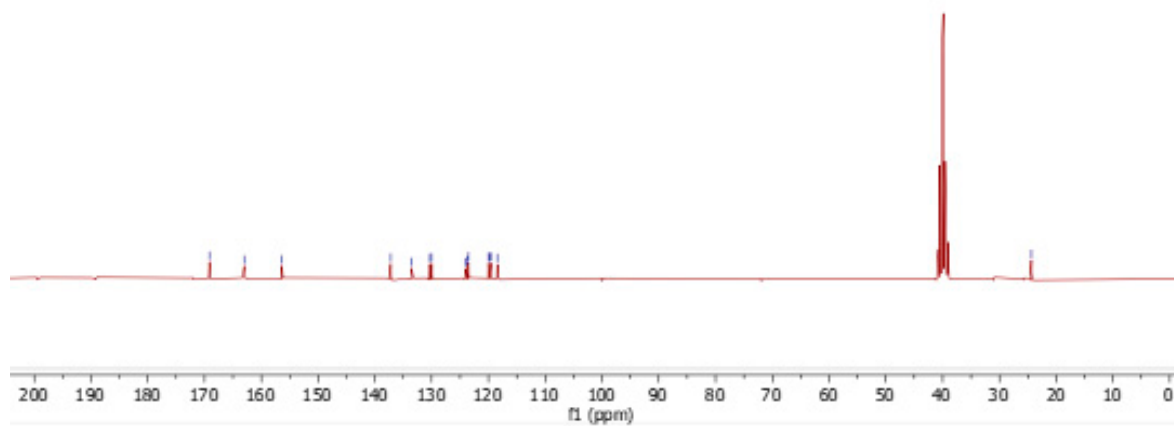

**Figure S4**  $^{13}\text{C}$  NMR spectrum of compound **2**

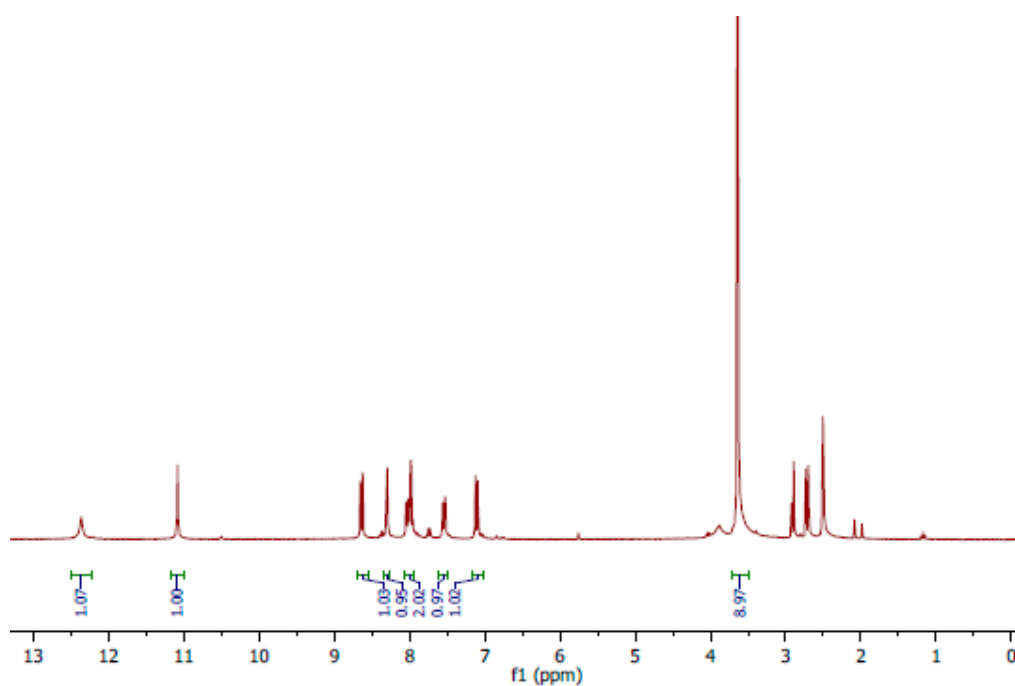

**Figure S5**  $^1\text{H}$  NMR spectrum of compound **3**

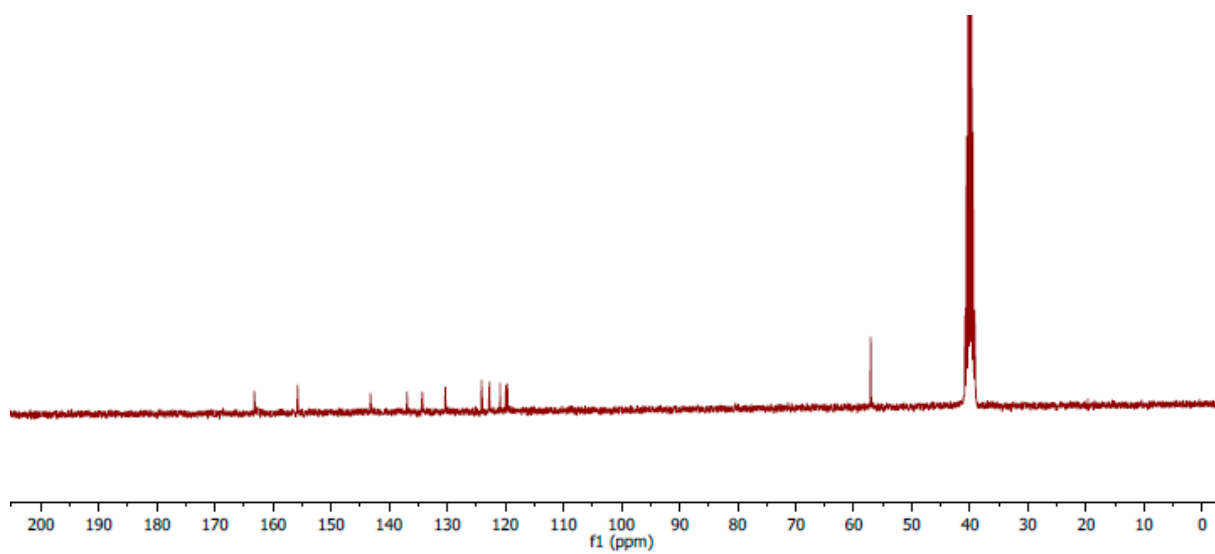

**Figure S6**  $^{13}\text{C}$  NMR spectrum of compound **3**

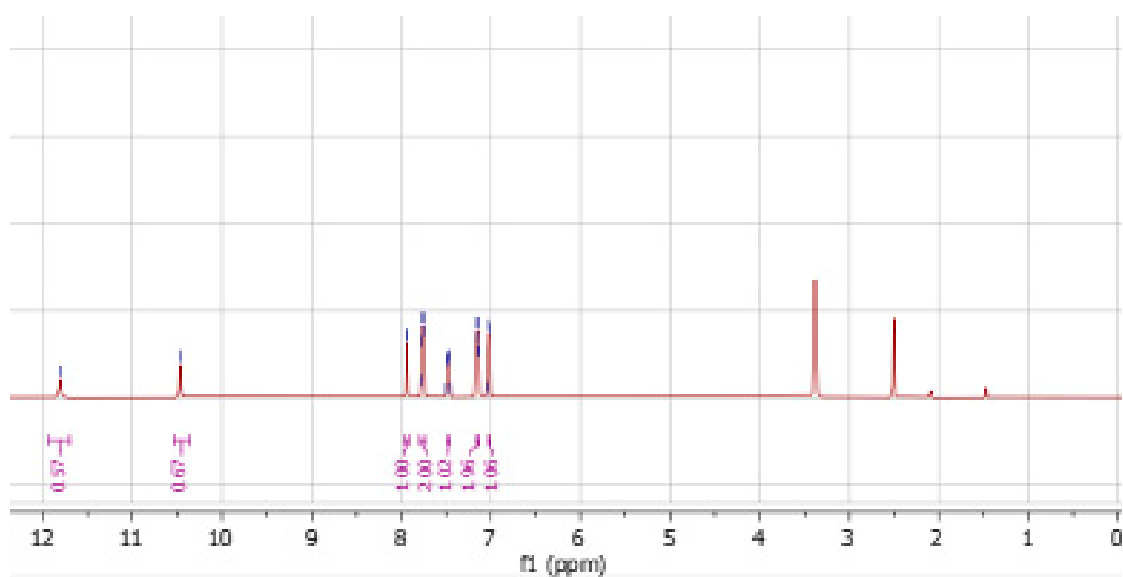

Figure S7 <sup>1</sup>H NMR spectrum of compound 4

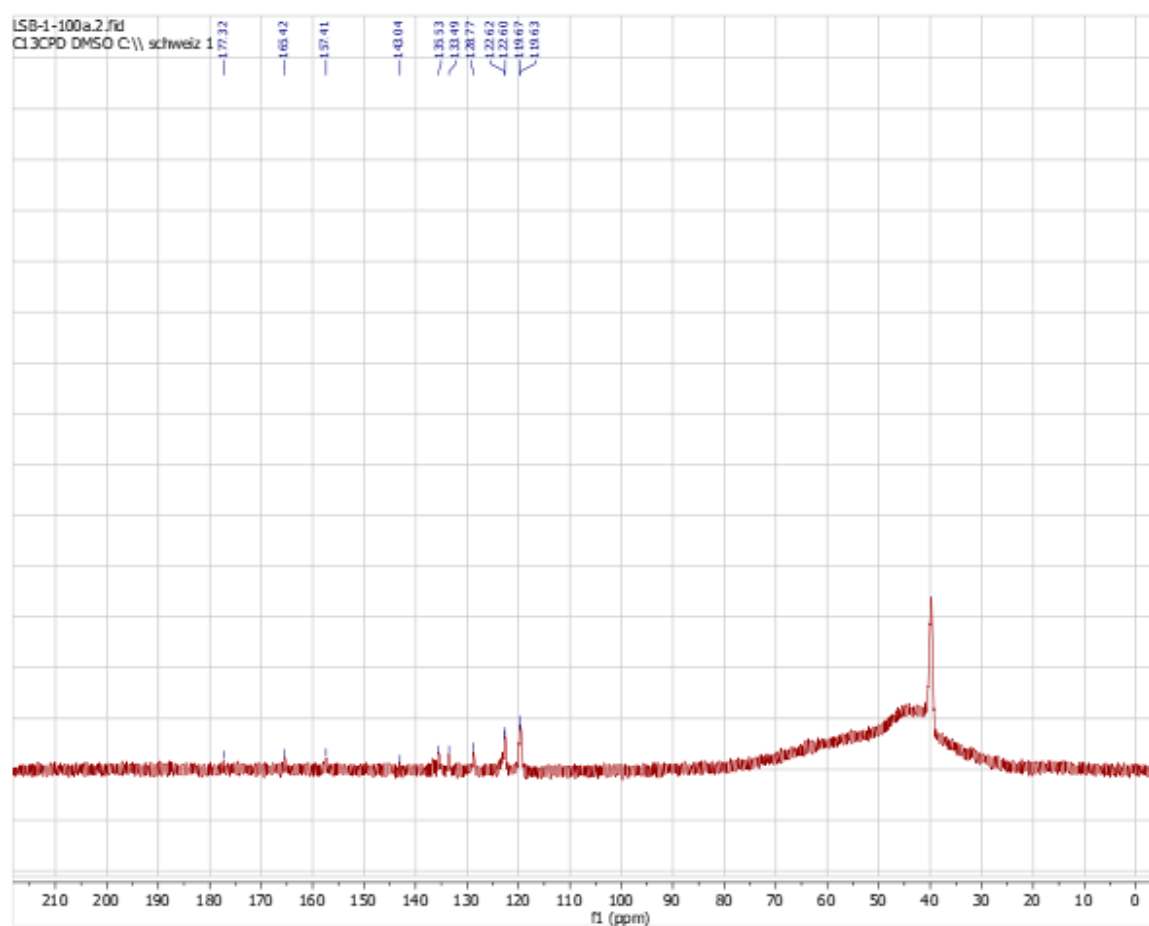

Figure S8 <sup>13</sup>C NMR spectrum of compound 4

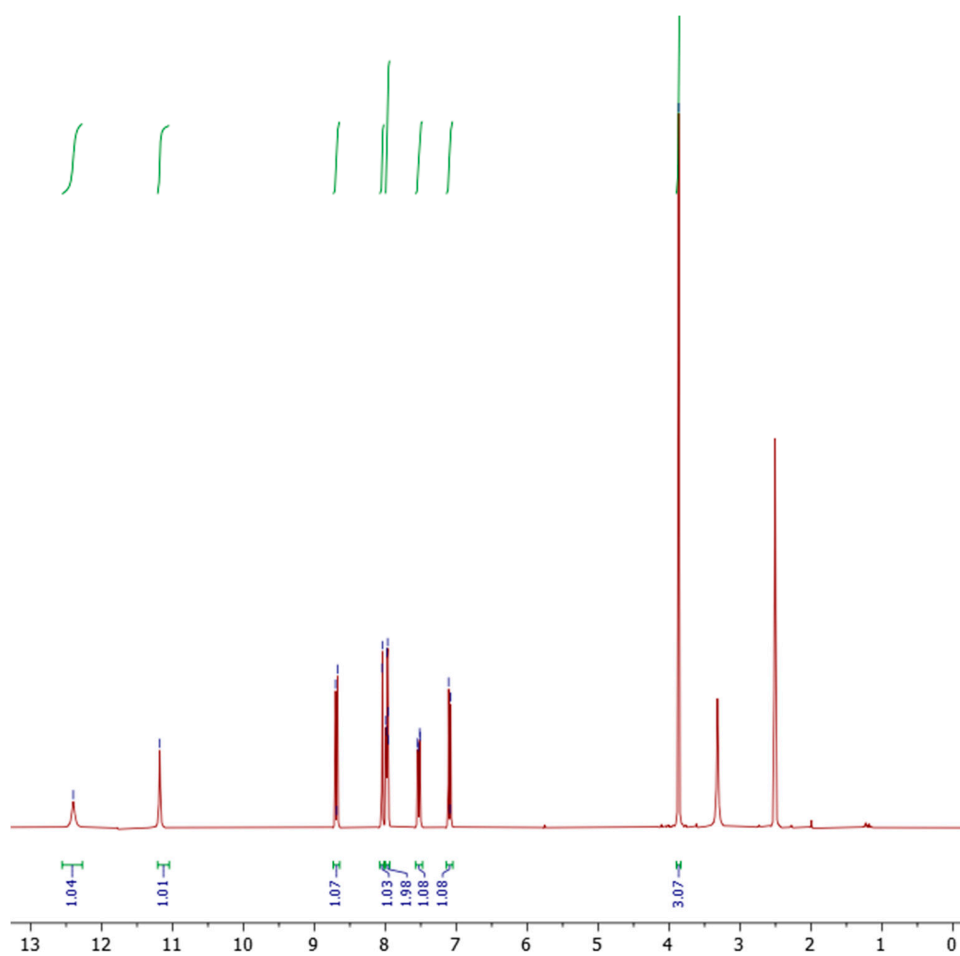

**Figure S9** <sup>1</sup>H NMR spectrum of compound **5a**

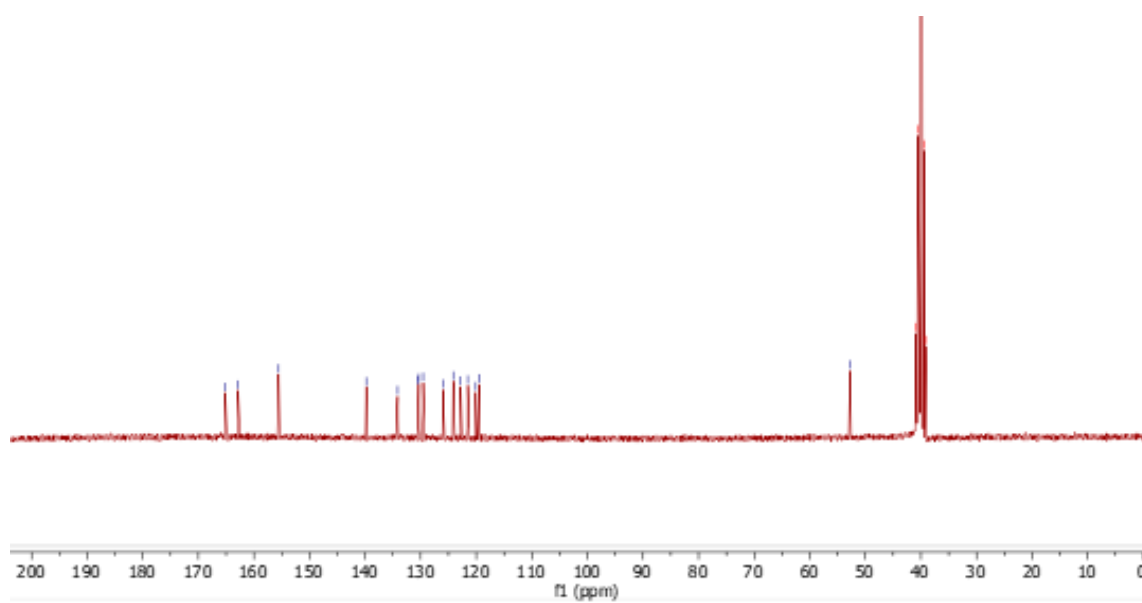

**Figure S10** <sup>13</sup>C NMR spectrum of compound **5a**

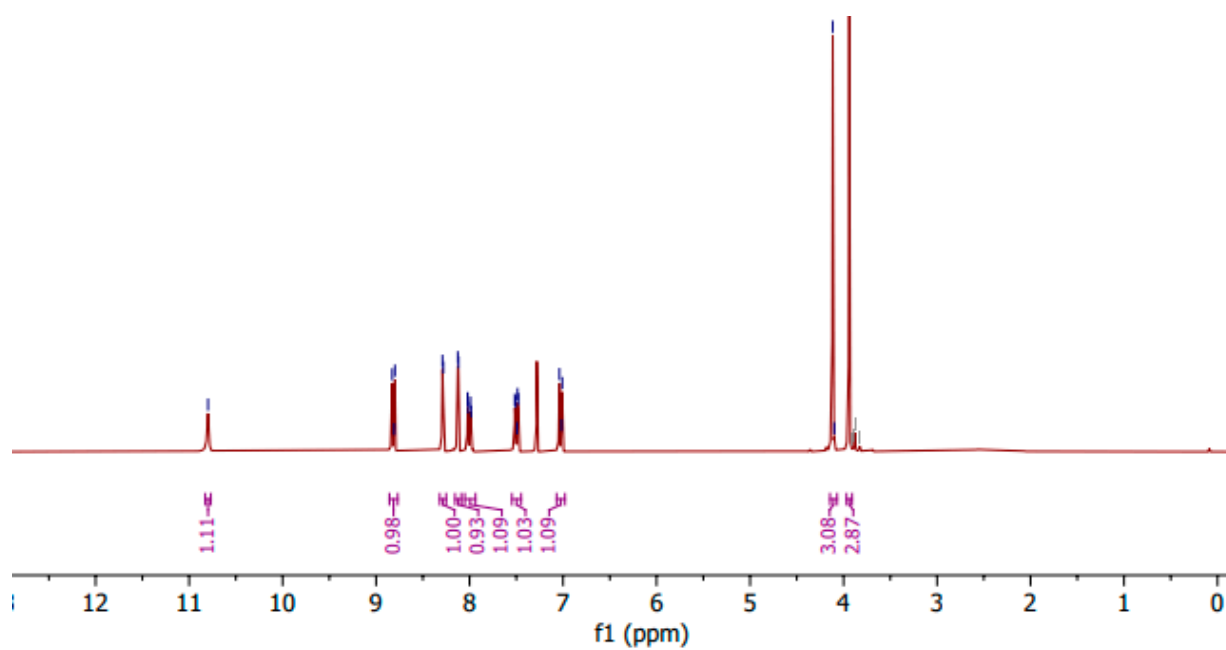

**Figure S11** <sup>1</sup>H NMR spectrum of compound **5b**

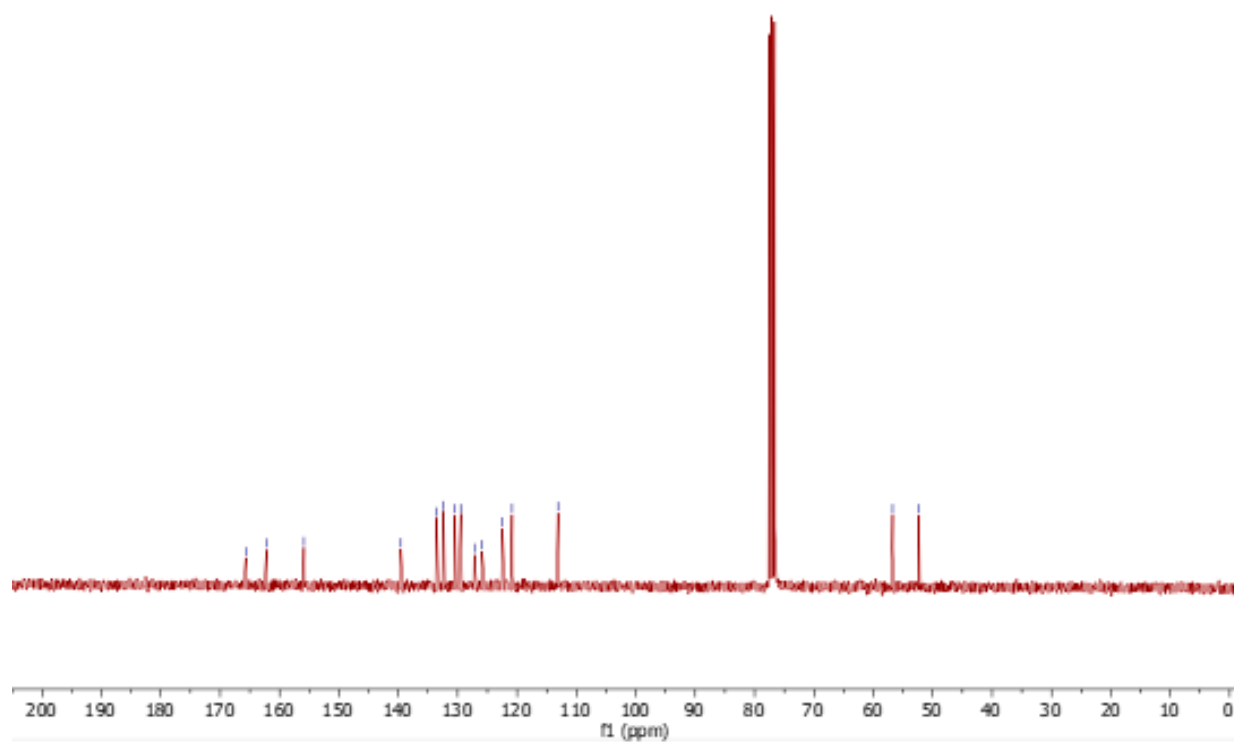

**Figure S12** <sup>13</sup>C NMR spectrum of compound **5b**

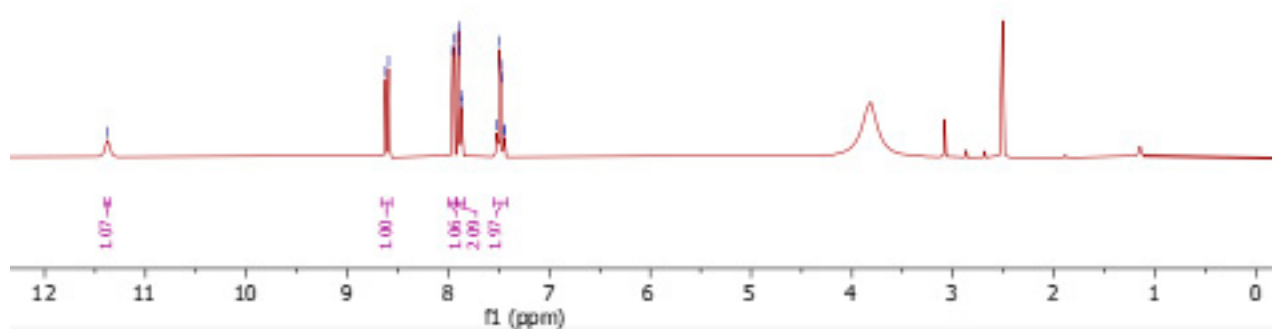

**Figure S13**  $^1\text{H}$  NMR spectrum of compound **6**

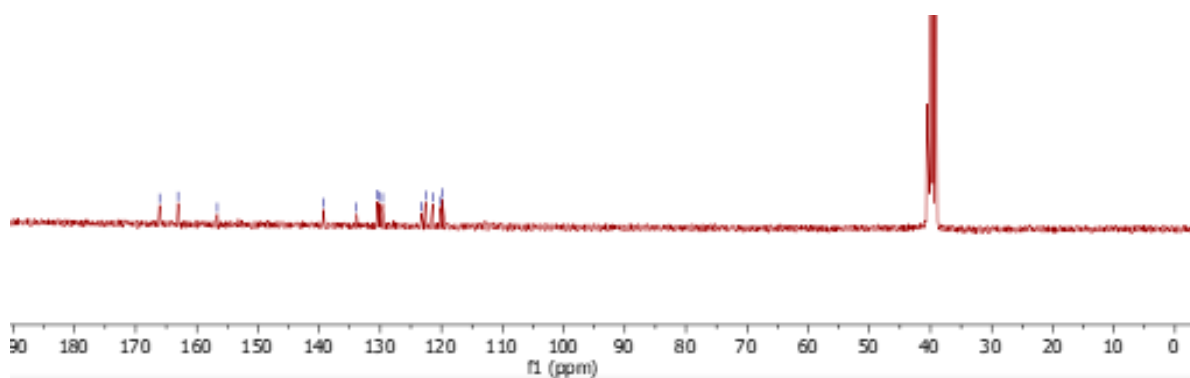

**Figure S14**  $^{13}\text{C}$  NMR spectrum of compound **6**

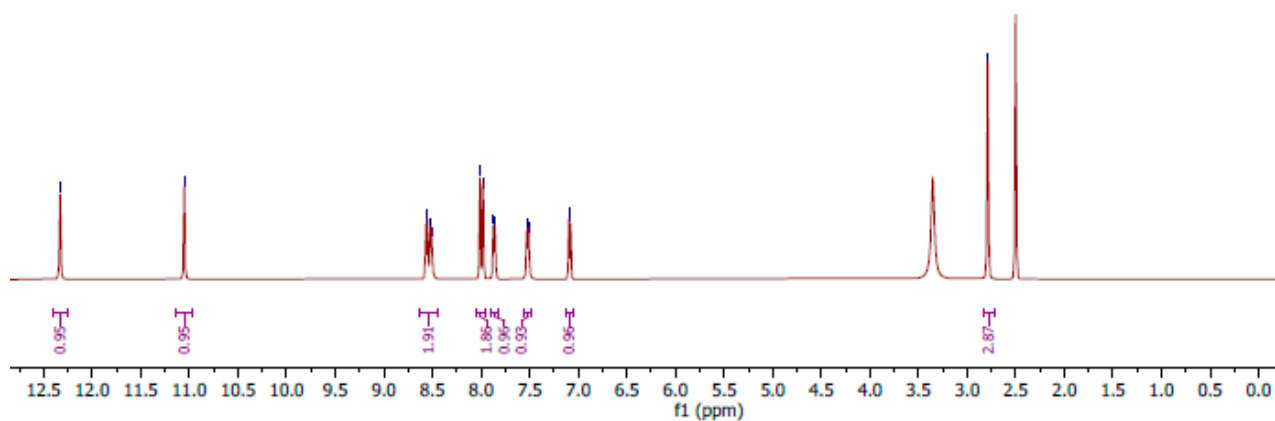

**Figure S15**  $^1\text{H}$  NMR spectrum of compound **7**



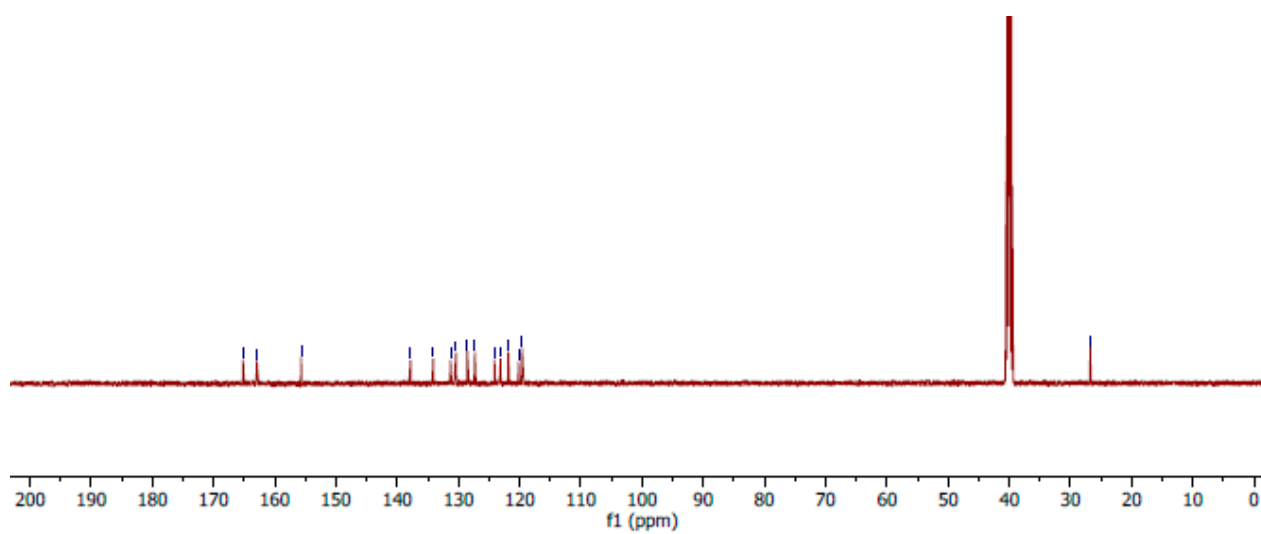

**Figure S16**  $^1\text{H}$  NMR spectrum of compound **7**

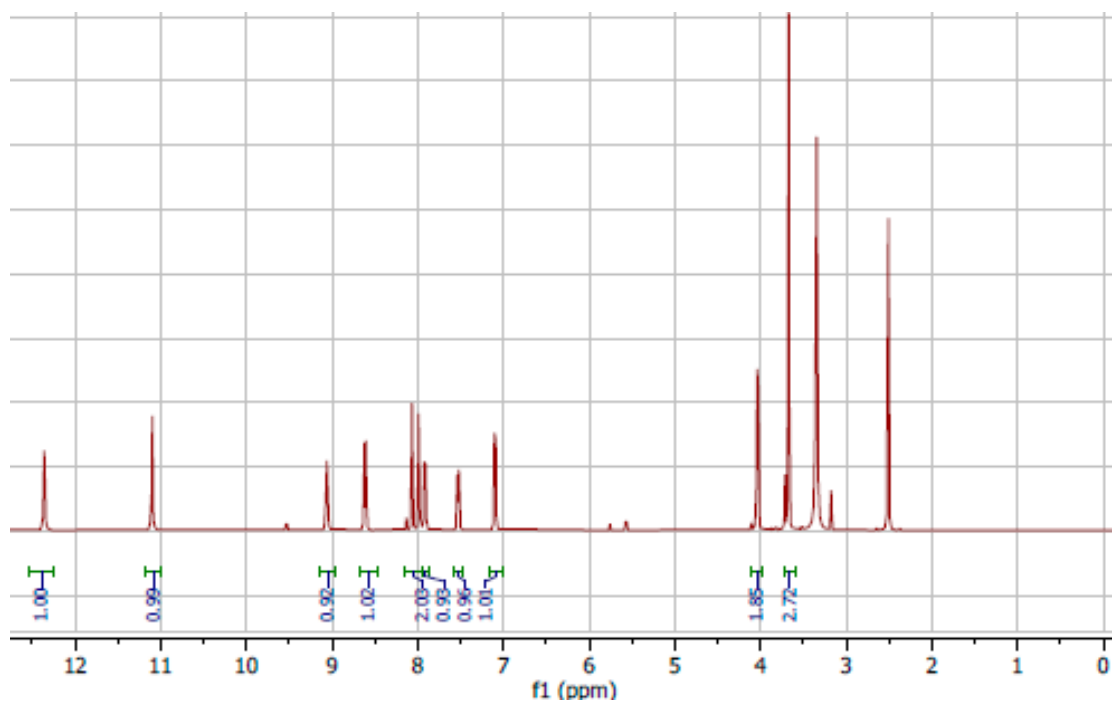

**Figure S17**  $^1\text{H}$  NMR spectrum of compound **8**

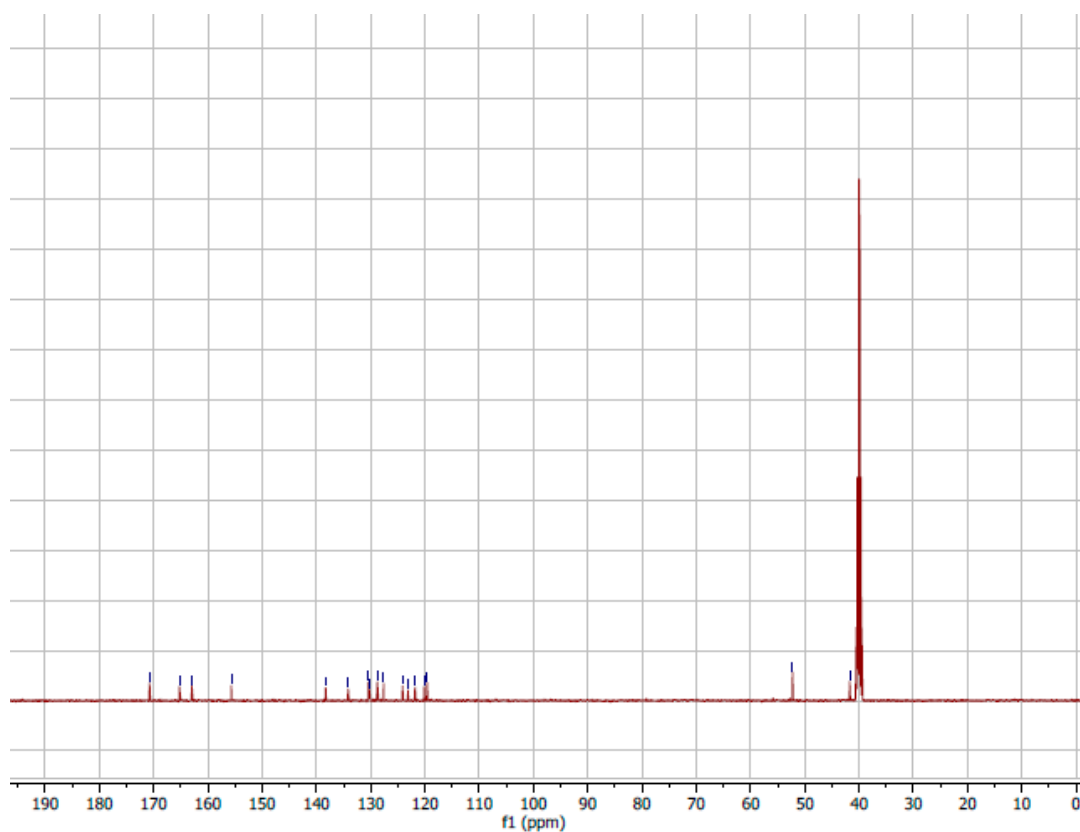

**Figure S18**  $^{13}\text{C}$  NMR spectrum of compound 8

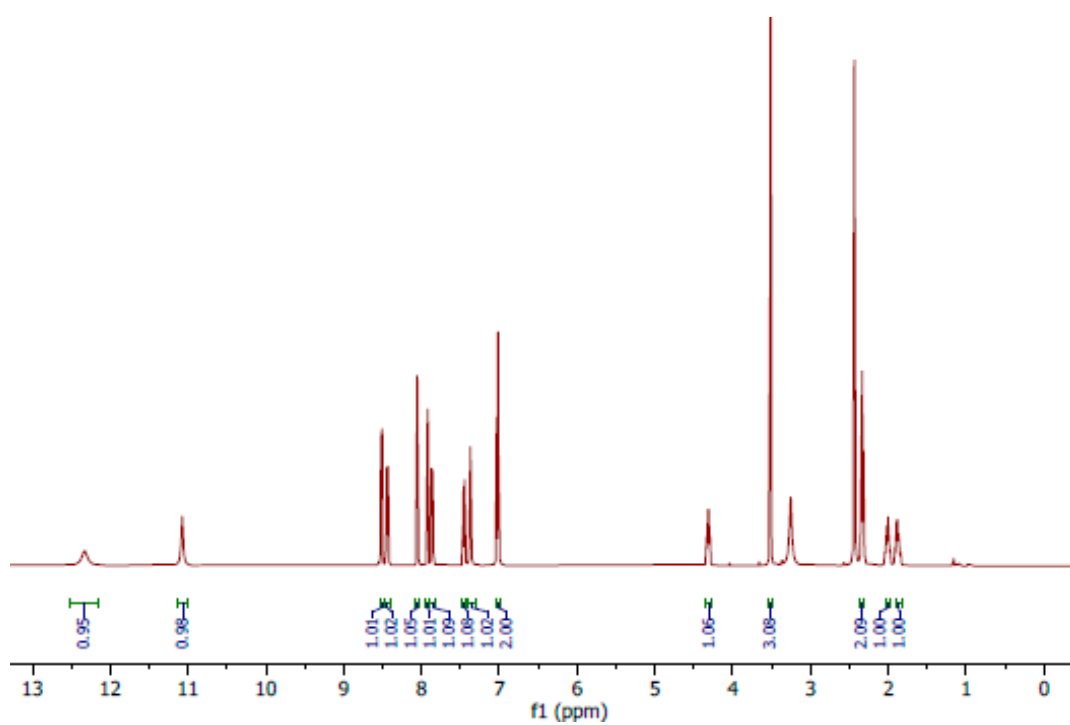

**Figure S19**  $^1\text{H}$  NMR spectrum of compound 9

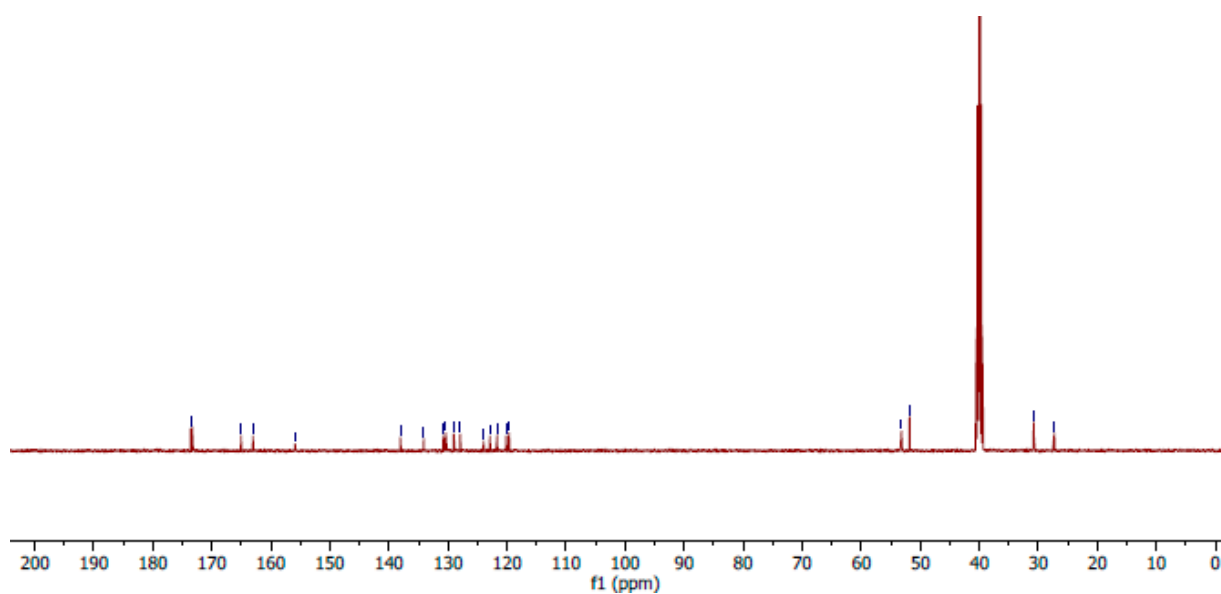

**Figure S20**  $^{13}\text{C}$  NMR spectrum of compound **9**

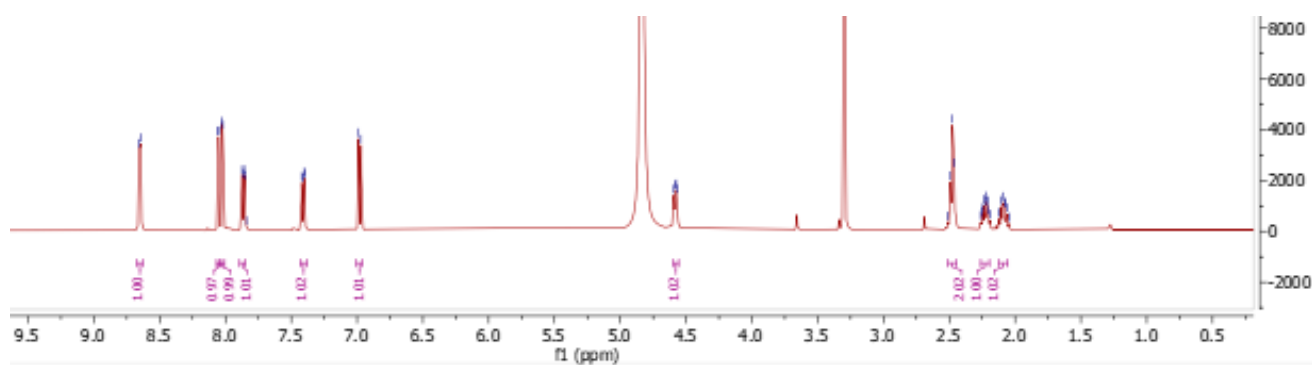

**Figure S21**  $^1\text{H}$  NMR spectrum of compound **10**

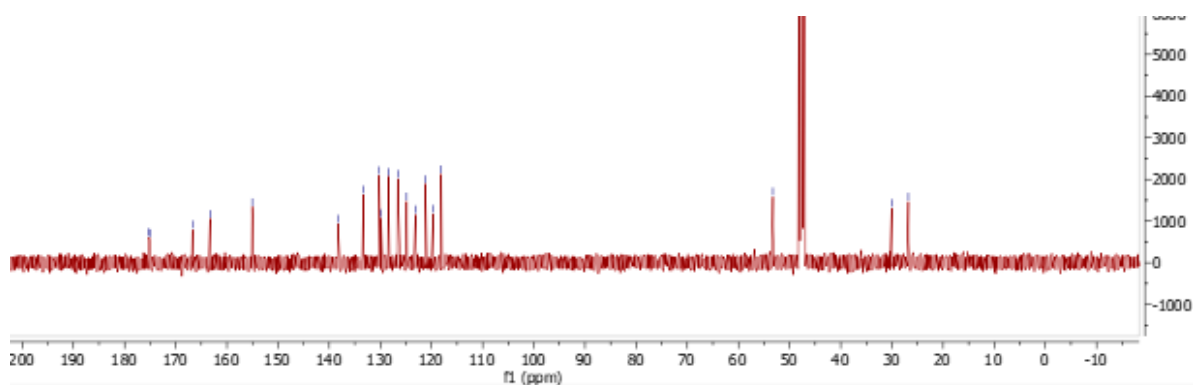

**Figure S22**  $^{13}\text{C}$  NMR spectrum of compound **10**

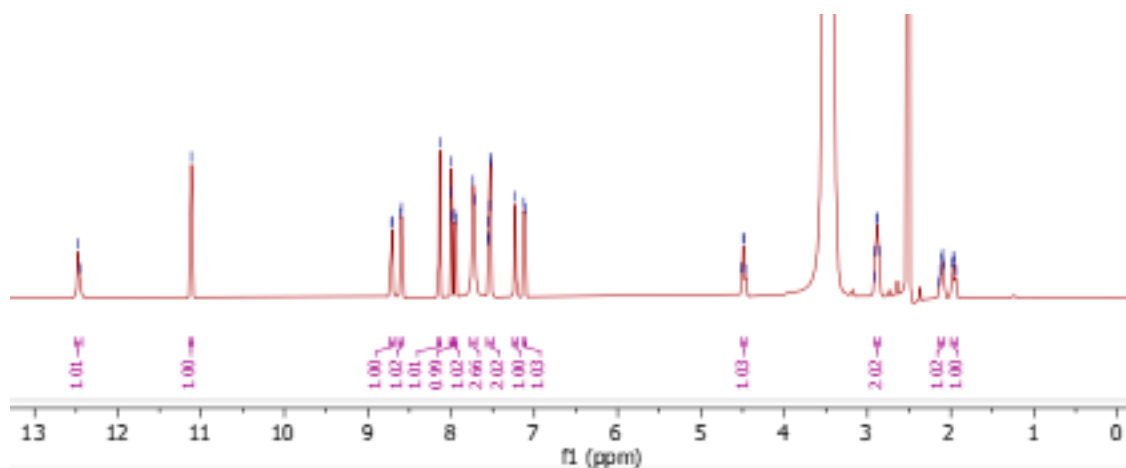

**Figure S23**  $^1\text{H}$  NMR spectrum of compound **11**

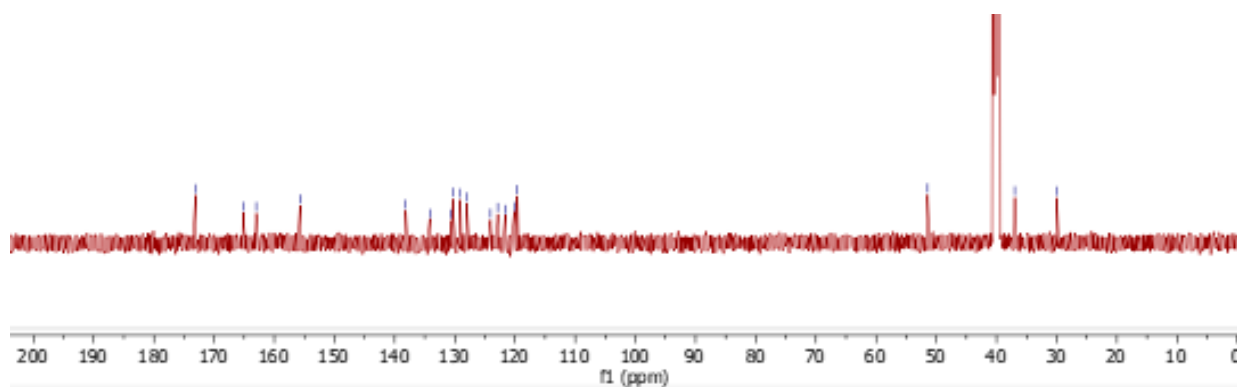

**Figure S24**  $^{13}\text{C}$  NMR spectrum of compound **11**

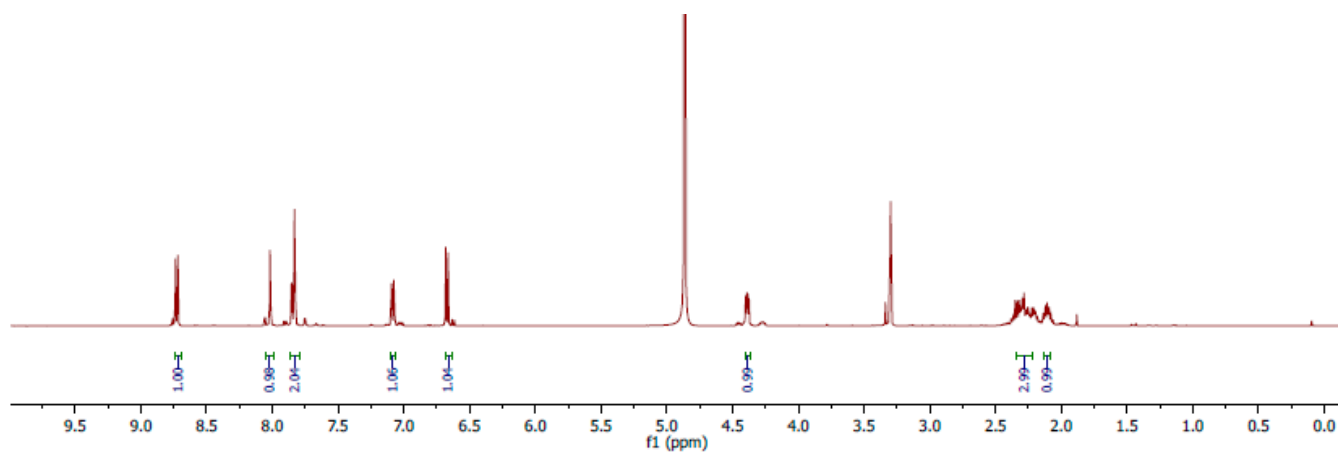

**Figure S25**  $^1\text{H}$  NMR spectrum of compound **12**

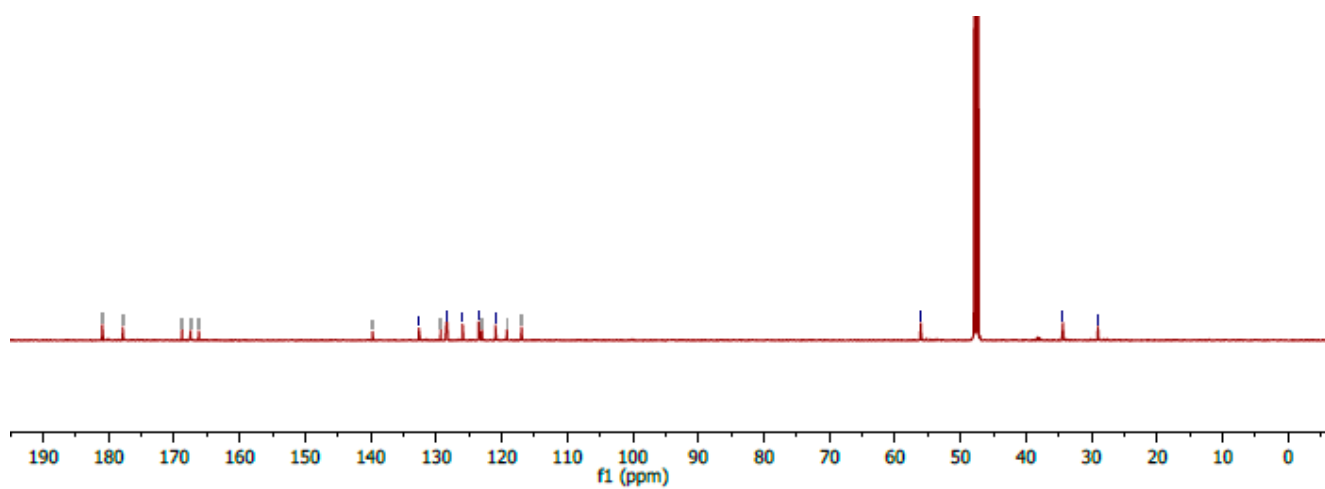

**Figure S26**  $^{13}\text{C}$  NMR spectrum of compound **12**

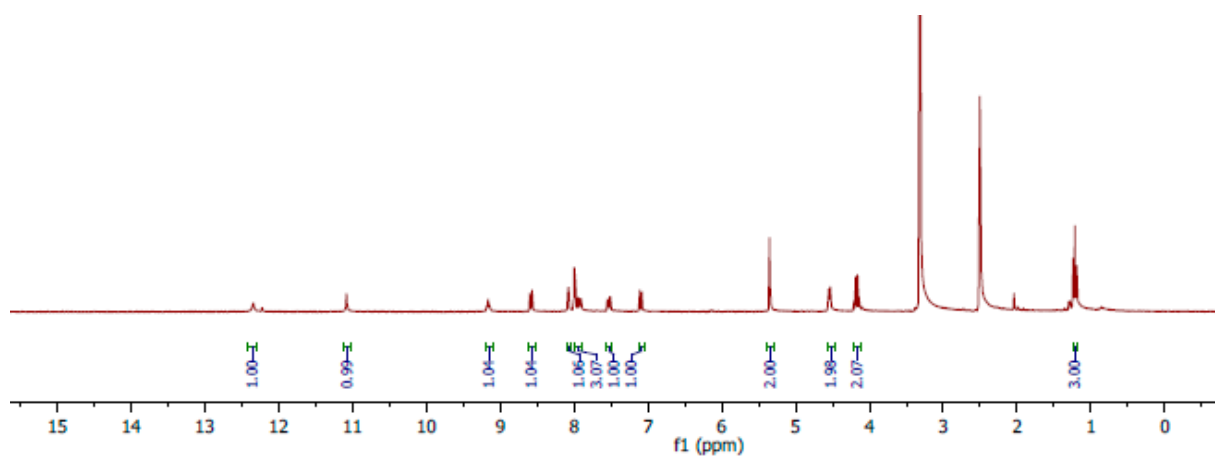

**Figure S27**  $^1\text{H}$  NMR spectrum of compound **13**

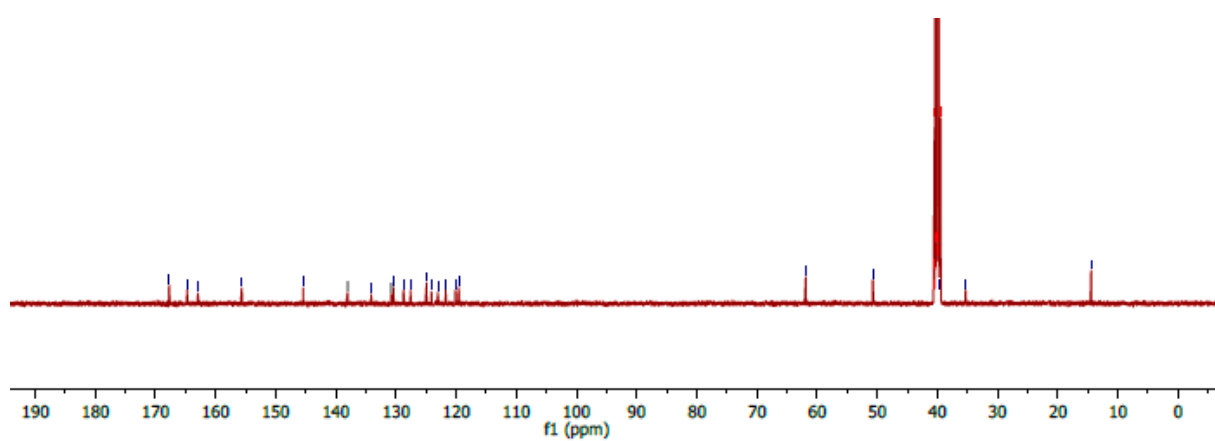

**Figure S28**  $^{13}\text{C}$  NMR spectrum of compound **13**

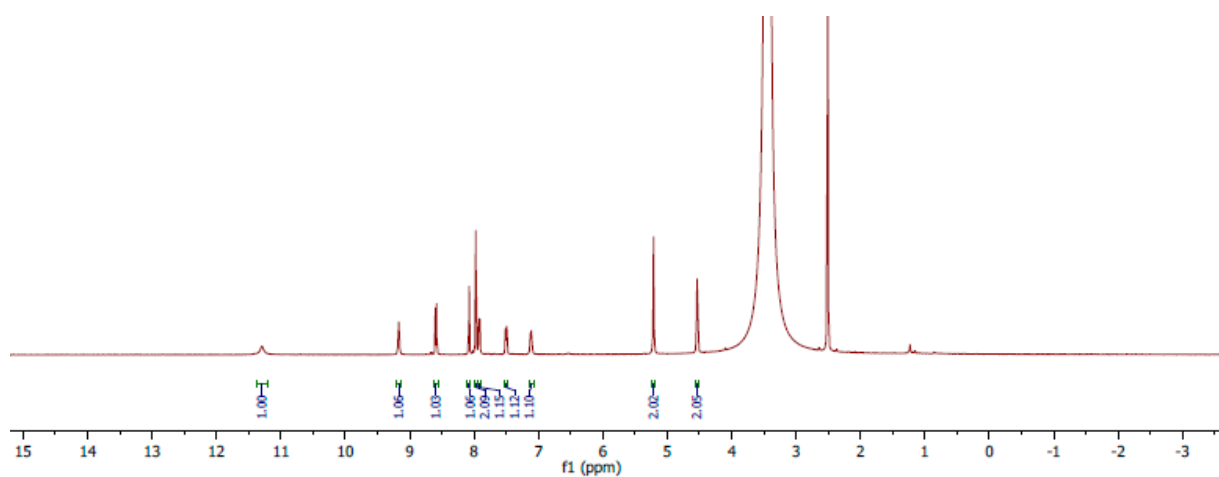

**Figure S29**  $^1\text{H}$  NMR spectrum of compound **14**

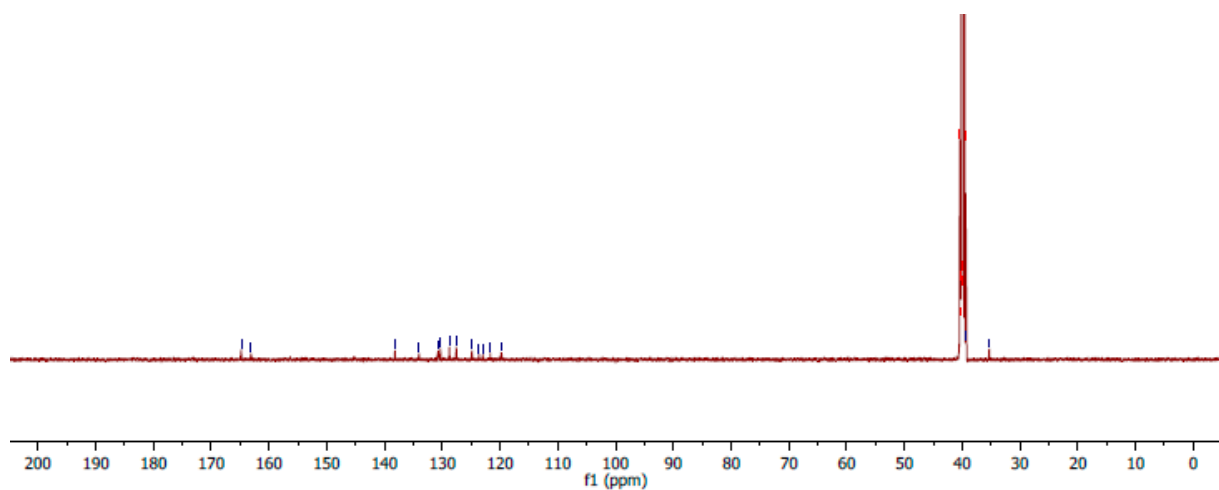

**Figure S30**  $^{13}\text{C}$  NMR spectrum of compound **14**

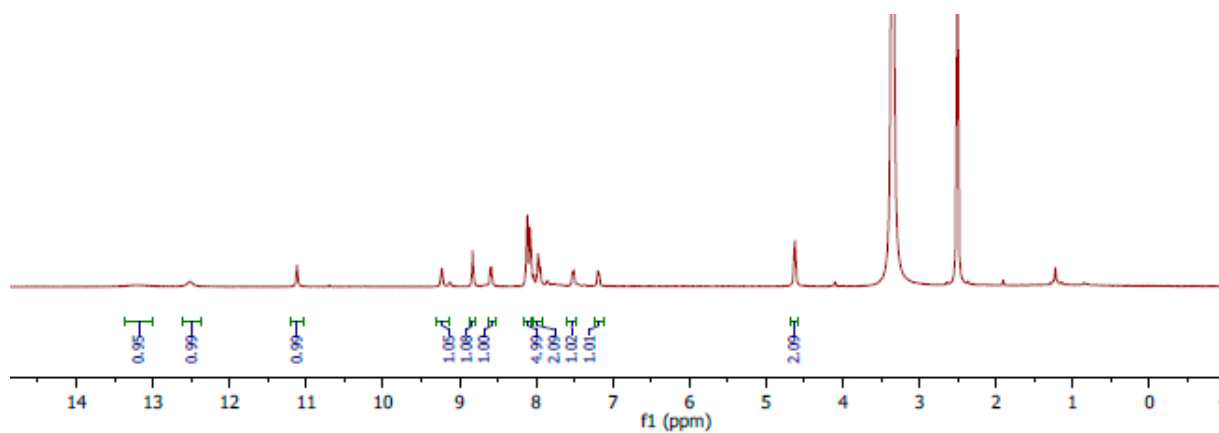

**Figure S31**  $^1\text{H}$  NMR spectrum of compound **15**

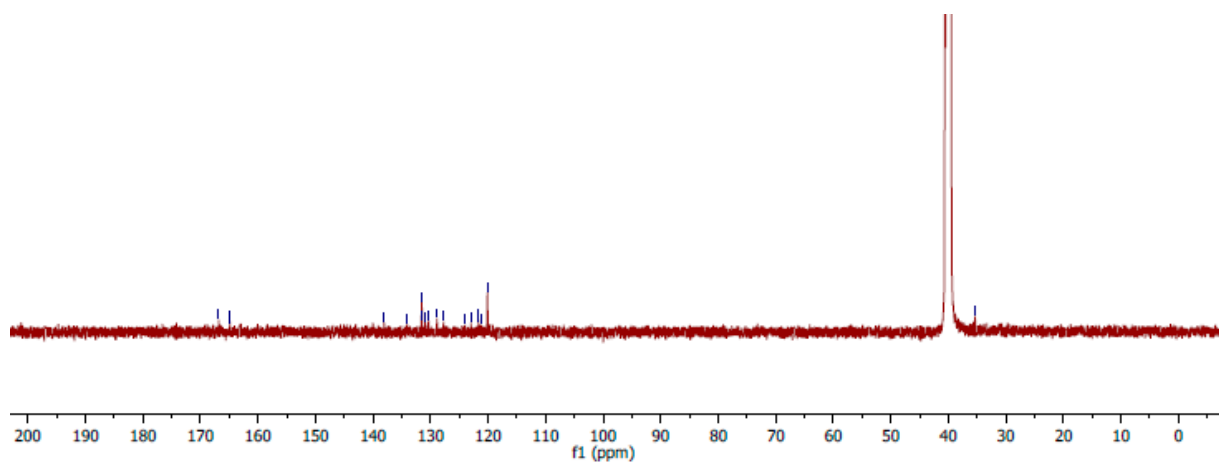

Figure S32 <sup>13</sup>C NMR spectrum of compound 15

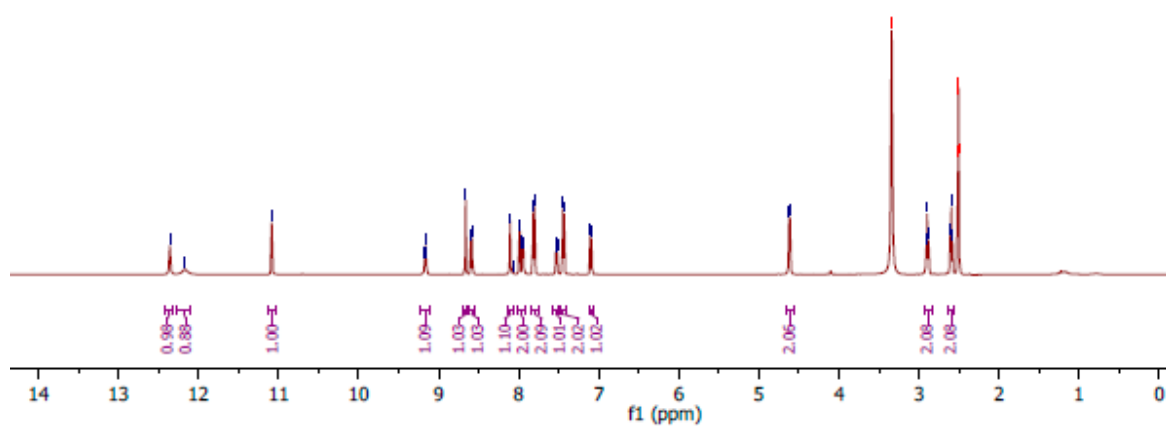

Figure S33 <sup>1</sup>H NMR spectrum of compound 17

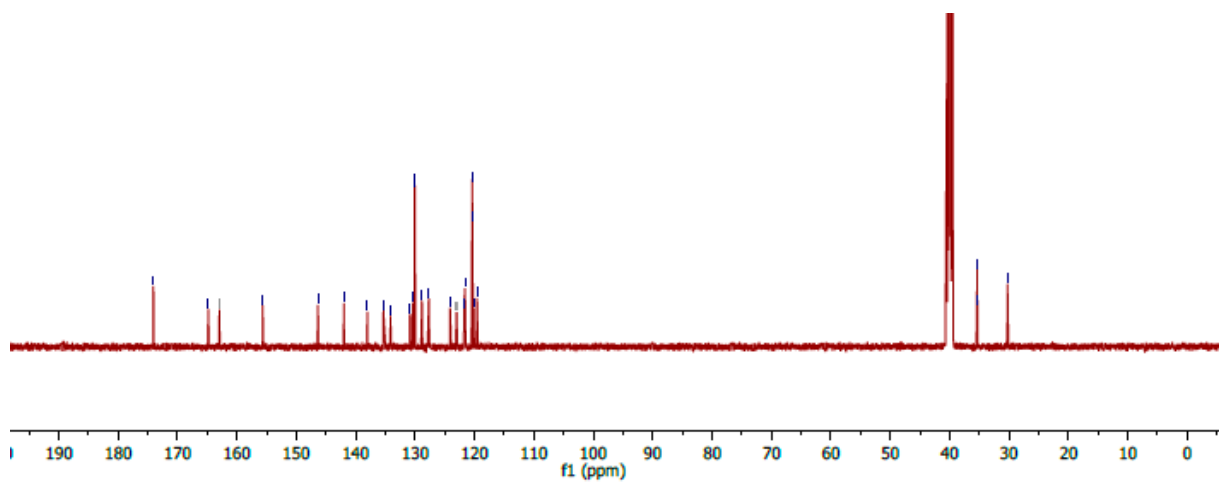

Figure S34 <sup>13</sup>C NMR spectrum of compound 17

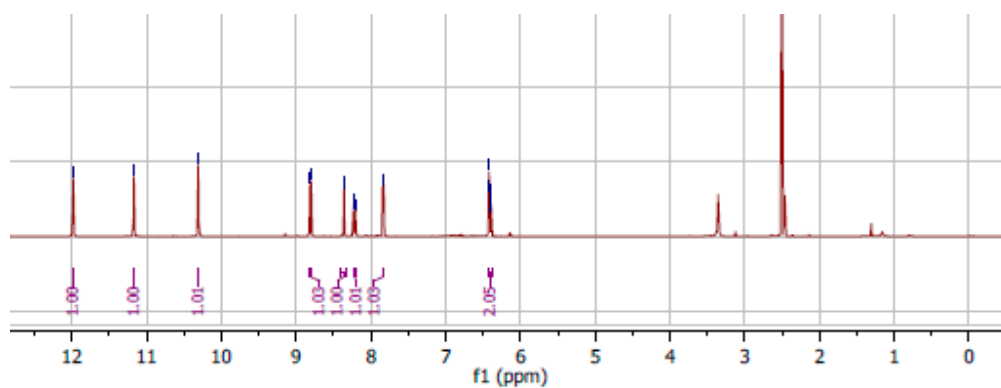

**Figure S35**  $^1\text{H}$  NMR spectrum of compound **18**

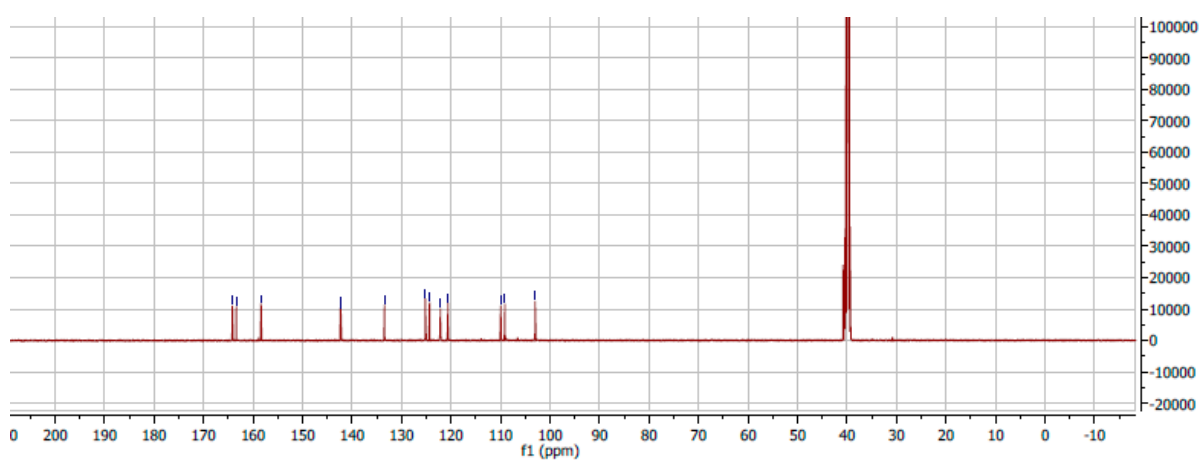

**Figure S36**  $^{13}\text{C}$  NMR spectrum of compound **18**

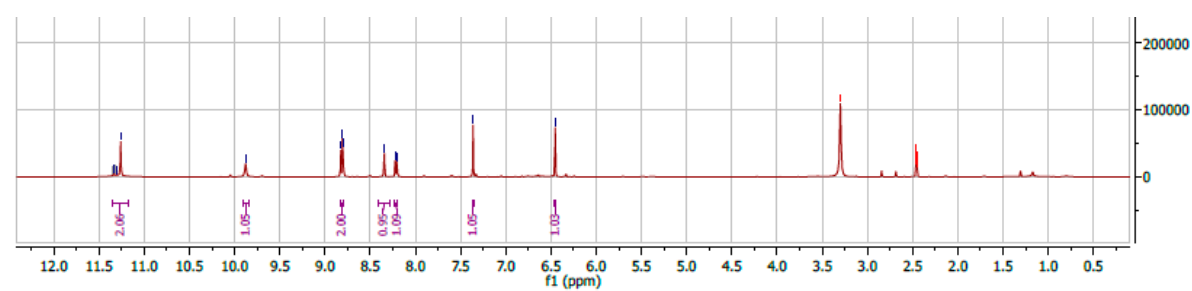

**Figure S37**  $^1\text{H}$  NMR spectrum of compound **19**



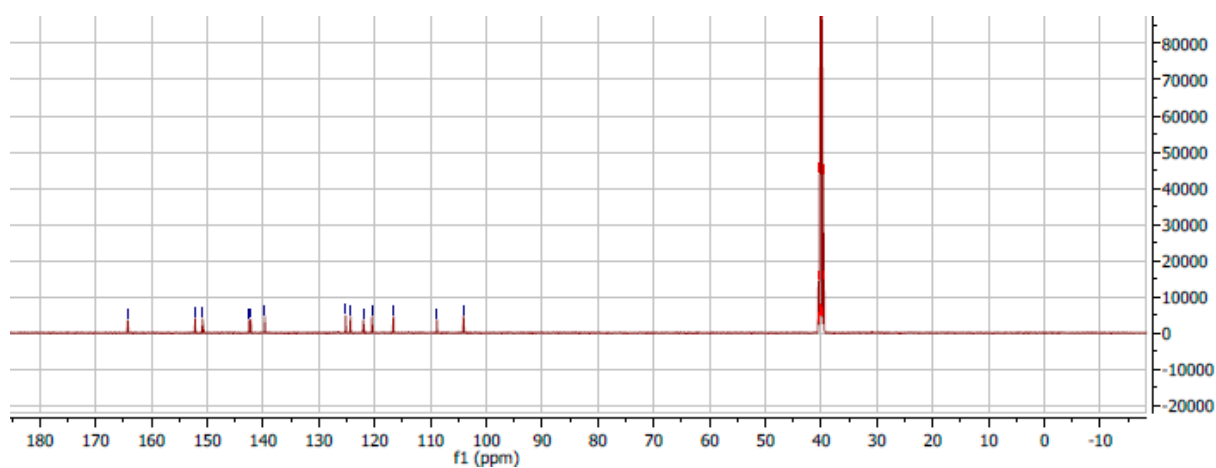

**Figure S38**  $^{13}\text{C}$  NMR spectrum of compound **19**

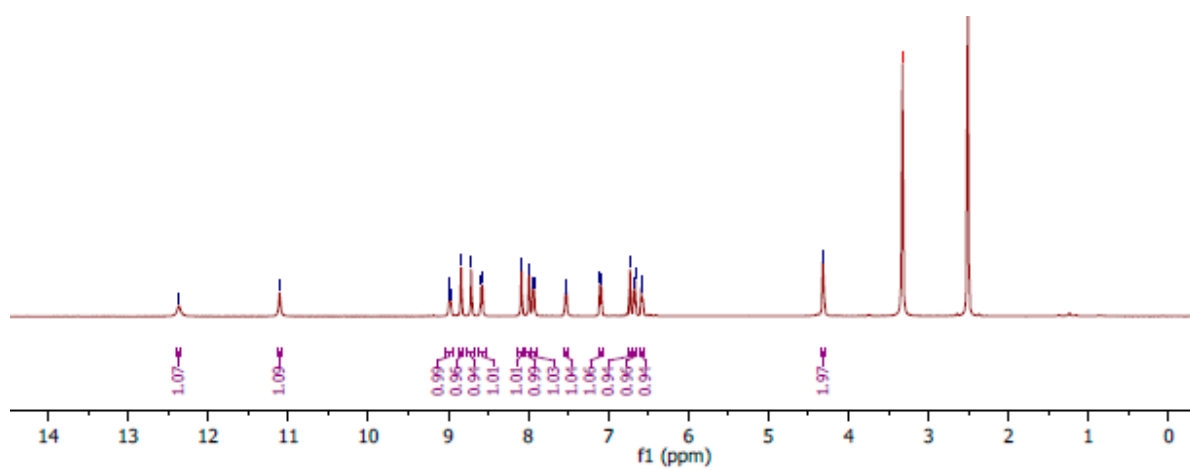

**Figure S39**  $^1\text{H}$  NMR spectrum of compound **20**

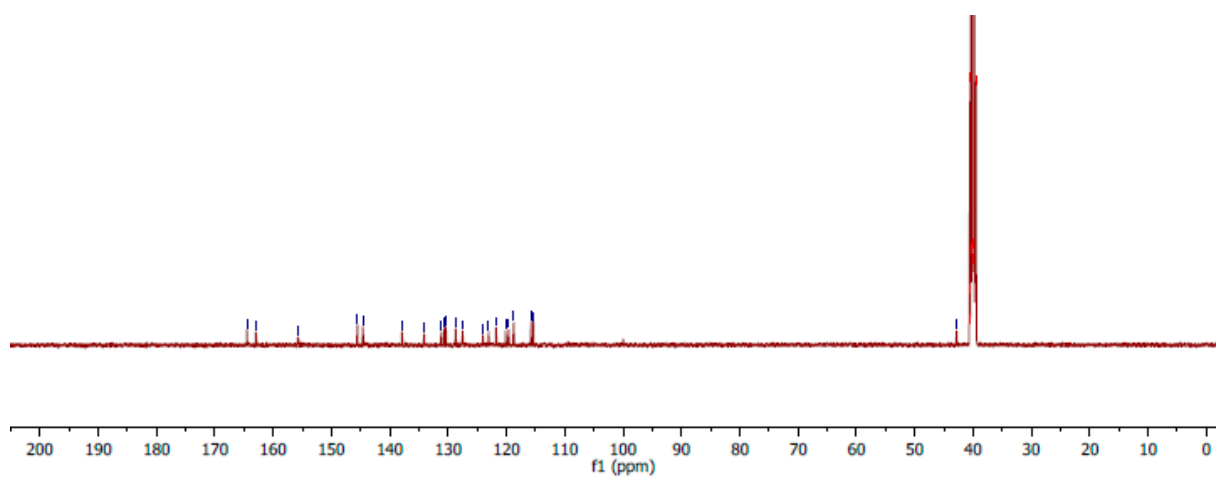

**Figure S40**  $^{13}\text{C}$  NMR spectrum of compound **20**

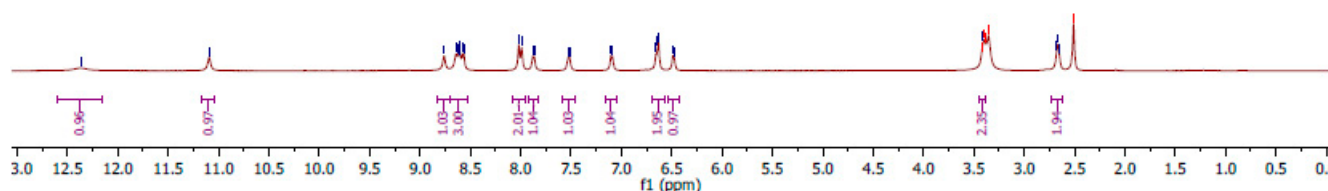

**Figure S41**  $^1\text{H}$  NMR spectrum of compound **21**

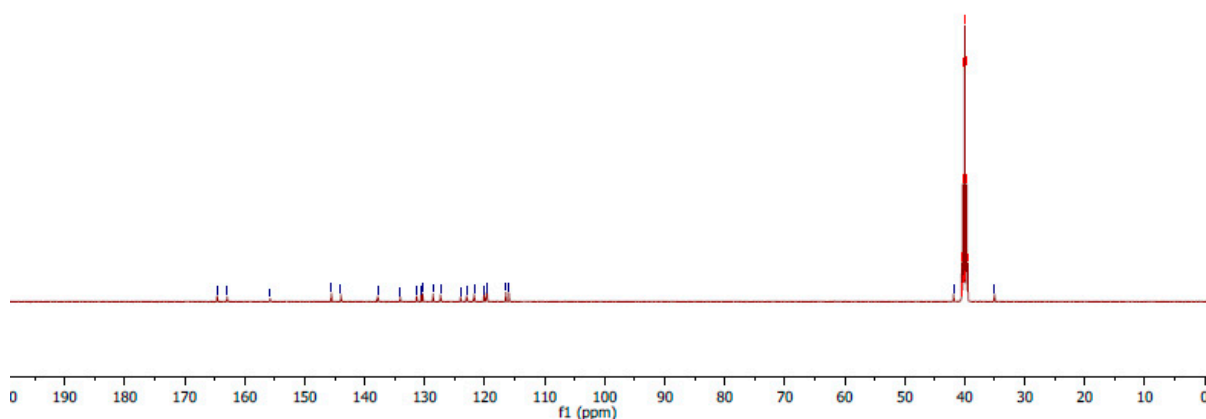

**Figure S42**  $^{13}\text{C}$  NMR spectrum of compound **21**

## Extended Biological Data

**Table S1** Minimum inhibitory concentration (MIC) in  $\mu\text{g/mL}$  of compounds **1-21** against 4 colistin-resistant strains of GNB. KP = *Klebsiella pneumoniae*, EC = *Escherichia coli*.

| Compound  | KP113250 | KP113254 | EC94393 | EC94474 |
|-----------|----------|----------|---------|---------|
| <b>1</b>  | >128     | >128     | >128    | >128    |
| <b>2</b>  | >128     | >128     | >128    | >128    |
| <b>3</b>  | >128     | >128     | >128    | >128    |
| <b>4</b>  | >128     | >128     | >128    | >128    |
| <b>5a</b> | >128     | >128     | >128    | >128    |
| <b>5b</b> | >128     | >128     | >128    | >128    |
| <b>6</b>  | >128     | >128     | >128    | >128    |
| <b>7</b>  | >128     | >128     | >128    | >128    |

|           |      |      |      |      |
|-----------|------|------|------|------|
| <b>8</b>  | >128 | >128 | >128 | >128 |
| <b>9</b>  | >128 | >128 | >128 | >128 |
| <b>10</b> | >128 | >128 | >128 | >128 |
| <b>11</b> | >128 | >128 | >128 | >128 |
| <b>12</b> | >128 | >128 | >128 | >128 |
| <b>14</b> | >128 | >128 | >128 | >128 |
| <b>15</b> | >128 | >128 | >128 | >128 |
| <b>16</b> | >128 | >128 | >128 | >128 |
| <b>17</b> | >128 | >128 | >128 | >128 |
| <b>18</b> | >128 | >128 | >128 | >128 |
| <b>19</b> | >128 | >128 | >128 | >128 |
| <b>20</b> | >128 | >128 | >128 | >128 |
| <b>21</b> | >128 | >128 | >128 | >128 |

**Table S2.** Colistin minimum inhibitory concentration (MIC) in combination with 4  $\mu$ M of compound **5b** and niclosamide against 4 colistin-resistant strains of GNB. KP = *Klebsiella pneumoniae*, EC = *Escherichia coli*.

| Compound       | Colistin MIC with 4 $\mu$ M compound ( $\mu$ g/mL) |          |         |         |
|----------------|----------------------------------------------------|----------|---------|---------|
|                | KP113250                                           | KP113254 | EC94393 | EC94474 |
| Niclosamide    | 0.25                                               | 0.5      | 0.25    | 0.5     |
| <b>5b</b>      | 256                                                | 256      | 8       | 16      |
| Colistin alone | 256                                                | 256      | 8       | 16      |
